# Supplementary material for: Rhodium-catalyzed (E)-selective cross-dimerization of terminal alkynes
Source: Royal Society of Chemistry journal article supplement (doi:10.1039/b804573a), 2008-01-01

## Supplementary information for

### Rhodium-catalyzed (*E*)-selective cross-dimerization of terminal alkynes

Takashi Katagiri, Hayato Tsurugi, Tetsuya Satoh, and Masahiro Miura\*

*Department of Applied Chemistry, Faculty of Engineering, Osaka University, Suita, Osaka  
565-0871, Japan.*

#### List of Contents for Experimental Section

General: S2

Rhodium-catalyzed reaction of triisopropylsilylacetylene (**1**) with 1-octyne (**2a**) (Entry 10 in Table 1): S2

Rhodium-catalyzed reaction of 1,1-diphenyl-1-trimethylsilyloxy-2-propyne (**4**) with 1-octyne (**2a**) (Scheme 2): S2

Rhodium-catalyzed reaction of 1,1-diphenyl-1-trimethylsilyloxy-2-propyne (**4**) with 1,6-heptadiyne (**9**) (Scheme 3): S2

Characterization data of products: S3-S7

References in supporting information: S8

<sup>1</sup>H and <sup>13</sup>C NMR spectra of products: S9-S11

**General.**  $^1\text{H}$  (400 MHz) and  $^{13}\text{C}$  NMR (100 MHz) spectra were measured for  $\text{CDCl}_3$  solutions. MS data were obtained by EI or CI. GC analysis was carried out using a silicon OV-17 column (i. d. 2.6 mm x 1.5 m) or a CBP-1 capillary column (i. d. 0.5 mm x 25 m). GC-MS analysis was carried out using a CBP-1 capillary column (i. d. 0.25 mm x 25 m). The hydroxy complex  $[\text{Rh}(\text{OH})(\text{cod})]_2$ ,<sup>S1</sup> iodo complex  $[\text{RhI}(\text{cod})]_2$ <sup>S2</sup> and alkyne **4**<sup>S3</sup> were prepared according to the published methods.

**Rhodium-catalyzed reaction of triisopropylsilylacetylene (1) with 1-octyne (2a) (Entry 10 in Table 1):** A mixture of  $[\text{RhI}(\text{cod})]_2$  (0.0075 mmol, 5.1 mg), Xantphos (0.015 mmol, 8.7 mg), **1** (0.50 mmol, 91 mg), **2a** (0.60 mmol, 66 mg) and 1-methylnaphthalene (ca. 50 mg) as internal standard in *o*-xylene (5 mL) was refluxed with stirring for 8 h under  $\text{N}_2$ , and then the solvent was evaporated to dryness. The residue was purified by silica gel column chromatography using hexane as eluent to afford **3a** as an oil (131 mg, 90% yield).

**Rhodium-catalyzed reaction of 1-trimethylsilyloxy-1,1-diphenyl-2-propyne (4) with 1-octyne (2a) (Scheme 2):** A mixture of  $[\text{RhI}(\text{cod})]_2$  (0.0075 mmol, 5.1 mg), Xantphos (0.015 mmol, 8.7 mg), **4** (0.50 mmol, 140 mg), **2a** (0.60 mmol, 66 mg) and 1-methylnaphthalene (ca. 50 mg) as internal standard in *o*-xylene (5 mL) was refluxed with stirring for 12 h under  $\text{N}_2$ , and then the solvent was evaporated to dryness. The residue was purified by silica gel column chromatography using hexane/ethyl acetate (v/v = 99.5/0.5) as eluent to afford **5** as an oil (116 mg, 60% yield).

**Rhodium-catalyzed reaction of 1-trimethylsilyloxy-1,1-diphenyl-2-propyne (4) with 1,6-heptadiyne (9) (Scheme 3):** A mixture of  $[\text{RhI}(\text{cod})]_2$  (0.0075 mmol, 5.1 mg), Xantphos (0.015 mmol, 8.7 mg), **4** (0.50 mmol, 140 mg), **9** (1.0 mmol, 92 mg) and 1-methylnaphthalene (ca. 50 mg) as internal standard in *o*-xylene (5 mL) was refluxed

with stirring for 8 h under N<sub>2</sub>, and then the solvent was evaporated to dryness. The residue was purified by silica gel column chromatography using hexane/ethyl acetate (v/v = 99.7/0.3) as eluent to afford **10** as an oil (121 mg, 52% yield).

**(E)-(Dec-3-en-1-ynyl)triisopropylsilane (3a)**

<sup>1</sup>H NMR (400 MHz, CDCl<sub>3</sub>) δ 0.89 (t, *J* = 7.0 Hz, 3H), 1.08 (m, 21H), 1.19-1.44 (m, 8H), 2.10 (ddt, <sup>4</sup>*J* = 1.5 Hz, *J* = 7.7 Hz, *J* = 7.0 Hz, 2H), 5.52 (dt, <sup>4</sup>*J* = 1.5 Hz, *J* = 15.8 Hz, 1H), 6.20 (dt, *J* = 15.8 Hz, *J* = 7.0 Hz, 1H). <sup>13</sup>C NMR (100 MHz, CDCl<sub>3</sub>) δ 11.34, 14.06, 18.62, 22.57, 28.59, 28.85, 31.66, 33.09, 88.52, 106.10, 109.84, 145.85. HRMS (EI) *m/z* calcd for C<sub>19</sub>H<sub>36</sub>Si: 292.2586 (M<sup>+</sup>); found: 292.2590.

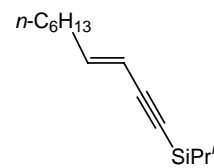

**(E)-Triisopropyl(5-phenylpent-3-en-1-ynyl)silane (3b)**

<sup>1</sup>H NMR (400 MHz, CDCl<sub>3</sub>) δ 1.04-1.09 (m, 21H), 3.43 (dd, <sup>4</sup>*J* = 1.5 Hz, *J* = 7.0 Hz, 2H), 5.54 (dt, <sup>4</sup>*J* = 1.5 Hz, *J* = 15.8 Hz, 1H), 6.34 (dt, *J* = 15.8 Hz, *J* = 7.0 Hz, 1H), 7.15-7.26 (m, 3H), 7.27-7.33 (m, 2H). <sup>13</sup>C NMR (100 MHz, CDCl<sub>3</sub>) δ 11.32, 18.63, 39.30, 89.74, 105.56, 111.25, 126.42, 128.56, 28.80, 138.80, 143.66. HRMS (EI) *m/z* calcd for C<sub>20</sub>H<sub>30</sub>Si (M<sup>+</sup>): 298.2117 (M<sup>+</sup>); found: 298.2113.

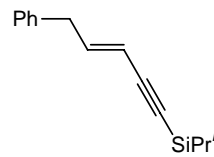

**(E)-(4-Cyclohexylbut-3-en-1-ynyl)triisopropylsilane (3c)**

<sup>1</sup>H NMR (400 MHz, CDCl<sub>3</sub>) δ 1.02-1.32(m, 27H), 1.60-1.76 (m, 4H), 1.97-2.07 (m, 1H), 5.48 (dt, <sup>4</sup>*J* = 1.5 Hz, *J* = 16.1 Hz, 1H), 6.15 (dd, *J* = 7.0 Hz, *J* = 16.1 Hz, 1H). <sup>13</sup>C NMR (100 MHz, CDCl<sub>3</sub>) δ 11.35, 18.64, 25.86, 26.04, 32.18, 41.21, 88.74, 106.33, 107.61, 151.01. HRMS (EI) *m/z* calcd for C<sub>19</sub>H<sub>34</sub>Si (M<sup>+</sup>): 290.2430; found: 290.2438.

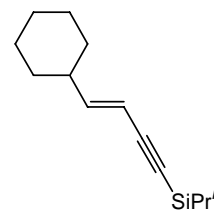

**(E)-8-(Triisopropylsilyl)oct-5-en-7-ynenitrile (3d)**

$^1\text{H}$  NMR (400 MHz,  $\text{CDCl}_3$ )  $\delta$  1.03-1.10 (m, 21H), 1.78 (tt,  $J$  = 7.3 Hz, 2H), 2.28 (ddt,  $^4J$  = 1.5 Hz,  $J$  = 7.3 Hz,  $J$  = 7.3 Hz, 2H), 2.36 (t,  $J$  = 7.3 Hz, 2H), 5.61 (dt,  $^4J$  = 1.5 Hz,  $J$  = 15.8 Hz, 1H), 6.10 (dt,  $J$  = 15.8 Hz,  $J$  = 7.3 Hz, 1H).  $^{13}\text{C}$  NMR (100 MHz,  $\text{CDCl}_3$ )  $\delta$  11.27, 16.48, 18.60, 24.40, 31.58, 90.16, 105.03, 112.30, 119.21, 141.96. HRMS (CI)  $m/z$  calcd for  $\text{C}_{17}\text{H}_{30}\text{NSi}$  ( $\text{M}+\text{H}$ ): 276.2148; found: 276.2141.

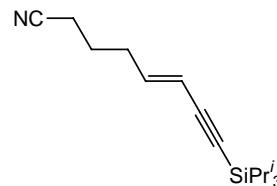

**(E)-7-(Triisopropylsilyl)hept-4-en-yn-1-ol (3e)**

$^1\text{H}$  NMR (400 MHz,  $\text{CDCl}_3$ )  $\delta$  1.05-1.10 (m, 21H), 1.63-1.72 (m, 2H), 2.16-2.24 (m, 2H), 3.66 (t,  $J$  = 6.4 Hz, 2H), 5.58 (d,  $J$  = 15.8 Hz, 1H), 6.20 (dt,  $J$  = 15.8 Hz,  $J$  = 7.0 Hz, 1H).  $^{13}\text{C}$  NMR (100 MHz,  $\text{CDCl}_3$ )  $\delta$  11.31, 18.62, 29.31, 31.50, 62.16, 89.10, 105.71, 110.61, 144.62. HRMS (EI)  $m/z$  calcd for  $\text{C}_{16}\text{H}_{30}\text{OSi}$  ( $\text{M}^+$ ): 266.2066; found: 266.2075.

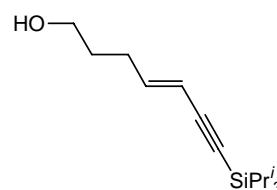

**(E)-8-(Triisopropylsilyl)oct-5-en-7-ynoic acid methyl ester (3f)**

$^1\text{H}$  NMR (400 MHz,  $\text{CDCl}_3$ )  $\delta$  1.04-1.09 (m, 21H), 1.74 (tt,  $J$  = 7.3 Hz, 2H), 2.11-2.18 (m, 2H), 2.32 (t,  $J$  = 7.3 Hz, 2H), 3.66 (s, 3H), 5.54 (d,  $J$  = 15.8 Hz, 1H), 6.14 (dt,  $J$  = 7.0 Hz,  $J$  = 15.8 Hz, 1H).  $^{13}\text{C}$  NMR (100 MHz,  $\text{CDCl}_3$ )  $\delta$  11.32, 18.59, 23.82, 32.26, 33.28, 51.47, 89.23, 105.63, 111.04, 143.97, 173.68. HRMS (EI)  $m/z$  calcd for  $\text{C}_{18}\text{H}_{32}\text{O}_2\text{Si}$  ( $\text{M}^+$ ): 308.2172; found: 308.2170.

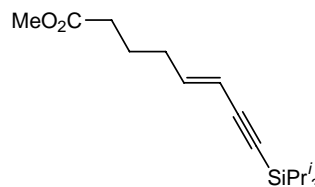

**(E)-1-(Triisopropylsilyl)dec-3-en-1-yn-5-ol (3g)**

$^1\text{H}$  NMR (400 MHz,  $\text{CDCl}_3$ )  $\delta$  0.89 (t,  $J$  = 6.8 Hz, 3H), 1.06-1.09 (m, 21H), 1.25-1.36 (m, 6H), 1.49-1.60 (m, 2H), 4.14 (dt,  $J$  = 6.2 Hz,  $J$  = 5.9 Hz, 1H), 5.75 (dd,  $^4J$  = 1.5 Hz,  $J$  = 15.8 Hz, 1H), 6.19 (dd,  $J$  = 6.2 Hz,  $J$  = 15.8 Hz, 1H).  $^{13}\text{C}$  NMR (100 MHz,  $\text{CDCl}_3$ )  $\delta$  11.28, 14.01, 18.60, 22.55, 24.97, 31.70, 36.90, 72.37, 91.44, 104.94, 110.21, 146.40. HRMS (CI)  $m/z$  calcd for  $\text{C}_{19}\text{H}_{37}\text{OSi}$  ( $\text{M}+\text{H}$ ): 309.2614; found: 309.2609.

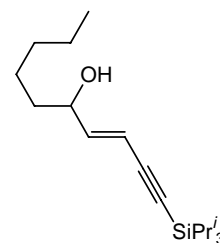

**(E)-2-Methyl-6-(triisopropylsilyl)hex-3-en-5-yn-2-ol (3h)**

$^1\text{H}$  NMR (400 MHz,  $\text{CDCl}_3$ )  $\delta$  1.04-1.10 (m, 21H), 1.33 (s, 6H), 5.77 (d,  $J = 16.1$  Hz, 1H), 6.30 (d,  $J = 16.1$  Hz, 1H).  $^{13}\text{C}$  NMR (100 MHz,  $\text{CDCl}_3$ )  $\delta$  11.32, 18.61, 29.44, 70.94, 91.20, 105.17, 107.39, 151.04. HRMS (EI)  $m/z$  calcd for  $\text{C}_{16}\text{H}_{30}\text{OSi}$  ( $\text{M}^+$ ): 266.2066; found: 266.2062.

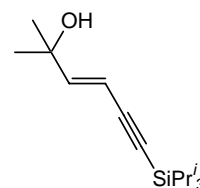

**(E)-1-(4-Triisopropylsilylbut-1-en-3-ynyl)cyclohexanol (3i)**

$^1\text{H}$  NMR (400 MHz,  $\text{CDCl}_3$ )  $\delta$  1.05-1.09 (m, 21H), 1.23-1.32 (m, 2H), 1.48-1.69 (m, 8H), 5.81 (d,  $J = 16.1$  Hz, 1H), 6.30 (d,  $J = 16.1$ , 1H).  $^{13}\text{C}$  NMR (100 MHz,  $\text{CDCl}_3$ )  $\delta$  11.28, 18.59, 21.79, 25.32, 37.44, 71.76, 91.12, 105.42, 107.79, 151.07. HRMS (EI)  $m/z$  calcd for  $\text{C}_{19}\text{H}_{34}\text{OSi}$  ( $\text{M}^+$ ): 306.2379; found: 306.2375.

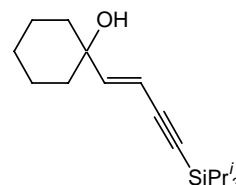

**(E)-1-(4-Triisopropylsilylbut-1-en-3-ynyl)cyclohexylamine (3j)**

$^1\text{H}$  NMR (400 MHz,  $\text{CDCl}_3$ )  $\delta$  1.02-1.11 (m, 23H), 1.30-1.64 (m, 8H), 5.69 (d,  $J = 16.1$  Hz, 1H), 6.23 (d,  $J = 16.1$  Hz, 1H).  $^{13}\text{C}$  NMR (100 MHz,  $\text{CDCl}_3$ )  $\delta$  11.34, 18.63, 22.05, 25.66, 38.27, 52.68, 90.37, 105.91, 107.03, 153.37. HRMS (EI)  $m/z$  calcd for  $\text{C}_{19}\text{H}_{35}\text{NSi}$  ( $\text{M}^+$ ): 305.2539; found: 305.2533.

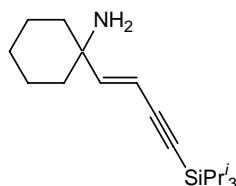

**(E)-Triisopropyl-[4-(4-methoxyphenyl)but-3-en-1-ynyl]silane (3k)**

$^1\text{H}$  NMR (400 MHz,  $\text{CDCl}_3$ )  $\delta$  1.09-1.13 (m, 21H), 3.79 (s, 3H), 6.07 (d,  $J = 16.1$  Hz, 1H), 6.82-6.87 (d,  $J = 8.8$  Hz, 2H), 6.94 (d,  $J = 16.1$  Hz, 1H), 7.28-7.33 (d,  $J = 8.8$  Hz, 2H).  $^{13}\text{C}$  NMR (100 MHz,  $\text{CDCl}_3$ )  $\delta$  11.40, 18.69, 55.28, 92.24, 106.06, 106.71, 114.14, 127.58, 129.14, 141.64, 160.11. HRMS (EI)  $m/z$  calcd for  $\text{C}_{20}\text{H}_{30}\text{OSi}$  ( $\text{M}^+$ ): 314.2066; found: 314.2070.

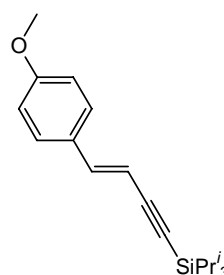

**(E)-(1,1-Diphenylundec-4-en-2-ynyloxy)trimethylsilane (5)**

$^1\text{H}$  NMR (400 MHz,  $\text{CDCl}_3$ )  $\delta$  0.11 (s, 9H), 0.88 (t,  $J = 7.0$  Hz, 3H), 1.24-1.34 (m, 6H), 1.36-1.43 (m, 2H), 2.13 (dt,  $^4J = 1.5$  Hz,

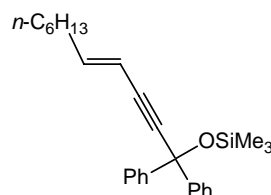

$J = 7.3$  Hz, 2H), 5.60 (dt,  $^4J = 1.5$  Hz,  $J = 15.8$  Hz, 1H), 6.21 (dt,  $J = 7.3$  Hz,  $J = 15.8$  Hz, 1H), 7.16-7.21 (m, 2H), 7.23-7.29 (m, 4H), 7.53-7.57 (m, 4H).  $^{13}\text{C}$  NMR (100 MHz,  $\text{CDCl}_3$ )  $\delta$  1.51, 14.08, 22.59, 28.62, 28.81, 31.65, 33.17, 75.92, 87.17, 90.34, 109.05, 126.07, 127.05, 127.92, 145.51, 146.95. HRMS (EI)  $m/z$  calcd for  $\text{C}_{26}\text{H}_{34}\text{OSi}$  ( $\text{M}^+$ ): 390.2379; found: 390.2366.

**(*E*)-8,8-Diphenyl-8-trimethylsilanyloxyoct-4-en-6-yn-1-ol (6)**

$^1\text{H}$  NMR (400 MHz,  $\text{CDCl}_3$ )  $\delta$  0.15 (s, 9H), 2.23-2.30 (m, 2H), 2.27 (ddt,  $^4J = 1.5$  Hz,  $J = 7.0$  Hz,  $J = 6.6$  Hz, 2H), 3.67 (t,  $J = 6.6$  Hz, 2H), 5.69 (dt,  $^4J = 1.5$  Hz,  $J = 16.1$  Hz, 1H), 6.23 (dt,  $J = 16.1$  Hz,  $J = 7.0$  Hz, 1H), 7.20-7.25 (m, 2H), 7.26-7.33 (m, 4H), 7.56-7.61 (m, 4H).  $^{13}\text{C}$  NMR (100 MHz,  $\text{CDCl}_3$ )  $\delta$  1.55, 29.42, 31.54, 62.08, 75.94, 86.88, 90.77, 109.79, 126.08, 127.12, 127.96, 144.34, 146.87. HRMS (EI)  $m/z$  calcd for  $\text{C}_{23}\text{H}_{28}\text{O}_2\text{Si}$  ( $\text{M}^+$ ): 364.1859; found: 364.1867.

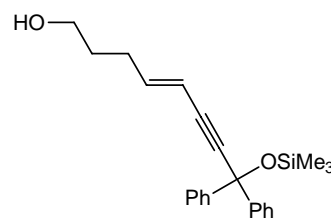

**(*E*)-9,9-Diphenyl-9-(trimethylsilanyloxy)non-5-en-7-ynoic acid methyl ester (7)**

$^1\text{H}$  NMR (400 MHz,  $\text{CDCl}_3$ )  $\delta$  0.14 (s, 9H), 1.74-1.82 (m, 2H), 2.17-2.24 (m, 2H), 2.35 (t,  $J = 7.7$  Hz, 2H), 3.69 (s, 3H), 5.67 (dt,  $^4J = 1.5$  Hz,  $J = 16.1$  Hz, 1H), 6.20 (dt,  $J = 7.0$  Hz,  $J = 16.1$  Hz, 1H), 7.19-7.24 (m, 2H), 7.27-7.32 (m, 4H), 7.56-7.60 (m, 4H).  $^{13}\text{C}$  NMR (100 MHz,  $\text{CDCl}_3$ )  $\delta$  1.48, 23.84, 32.34, 33.23, 51.49, 75.90, 86.75, 90.89, 110.19, 126.04, 127.06, 127.90, 143.66, 146.81, 173.64. HRMS (EI)  $m/z$  calcd for  $\text{C}_{25}\text{H}_{30}\text{O}_3\text{Si}$  ( $\text{M}^+$ ): 406.1964; found: 406.1956.

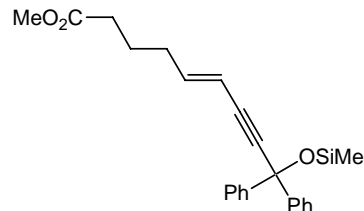

**(*E*)-Trimethyl-(1,1,5-triphenylpent-4-en-2-ynyloxy)silane (8)**

$^1\text{H}$  NMR (400 MHz,  $\text{CDCl}_3$ )  $\delta$  0.15 (s, 9H), 6.31 (d,  $J = 16.1$  Hz, 1H), 7.02 (d,  $J = 16.1$  Hz, 1H), 7.19-7.24 (m, 2H), 7.26-7.36 (m, 7H), 7.39-7.42 (m, 2H), 7.57-7.61 (m, 4H).  $^{13}\text{C}$  NMR (100 MHz,  $\text{CDCl}_3$ )  $\delta$  1.55, 76.04, 87.43, 94.22, 107.61, 126.07, 126.32, 127.16, 127.98, 128.73, 128.76, 136.07, 141.70, 146.71. HRMS (EI)  $m/z$  calcd for

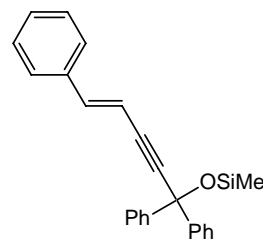

$C_{26}H_{26}OSi$  ( $M^+$ ): 382.1753; found: 382.1759.

**(8-Indan-5-yl-1,1-diphenyloct-4-en-2-ynyloxy)trimethylsilane (10)**

$^1H$  NMR (400 MHz,  $CDCl_3$ )  $\delta$  0.15 (s, 9H), 1.72-1.83 (m, 2H), 2.05-2.14 (m, 2H), 2.18-2.56 (m, 2H), 2.64 (t,  $J = 7.7$  Hz, 2H), 2.87-2.95 (m, 4H), 5.66 (dt,  $^4J = 1.5$  Hz,  $J = 15.8$  Hz, 1H), 6.27 (dt,  $J = 7.0$  Hz,  $J = 15.8$  Hz, 1H), 6.98 (d,  $J = 7.7$  Hz, 1H),

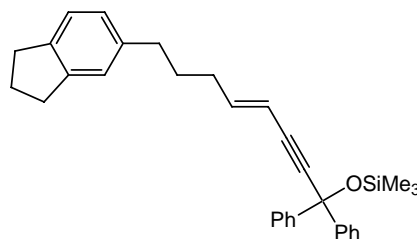

7.09 (s, 1H), 7.17 (d,  $J = 7.7$  Hz, 1H), 7.20-7.34 (m, 6H), 7.57-7.62 (m, 4H).  $^{13}C$  NMR (100 MHz,  $CDCl_3$ )  $\delta$  1.49, 25.51, 30.62, 32.47, 32.63, 32.81, 35.12, 75.93, 87.06, 90.58, 109.49, 124.15, 124.43, 126.05, 126.23, 127.03, 127.90, 139.83, 141.67, 144.41, 144.93, 146.91. HRMS (EI)  $m/z$  calcd for  $C_{32}H_{36}OSi$  ( $M^+$ ): 464.2535; found: 464.2537.

The  $^1H$  and  $^{13}C$  NMR spectra of **3a**, **5** and **10** are included as the representative (*E*)-enyne products.

## References

- S1) R. Uson, L. A. Oro and J. A. Cabwza, *Inorg. Synth.*, 1985, **23**, 126.
- S2) J. Chatt and L. M. Venanzi, *J. Chem. Soc.*, 1957, 4735.
- S3) J. R. Granja, L. Castedo and A. Mourifio, *J. Org. Chem.*, 1993, **58**, 124.

[<sup>1</sup>H and <sup>13</sup>C NMR Spectra of **3a**]

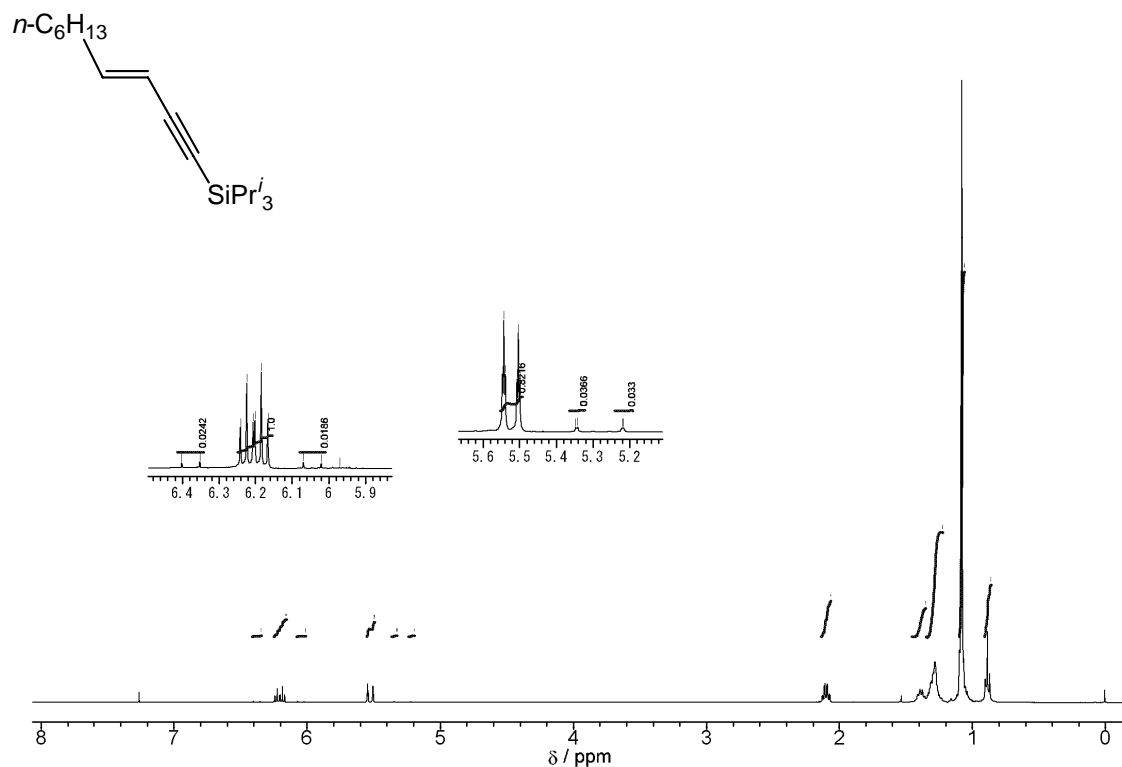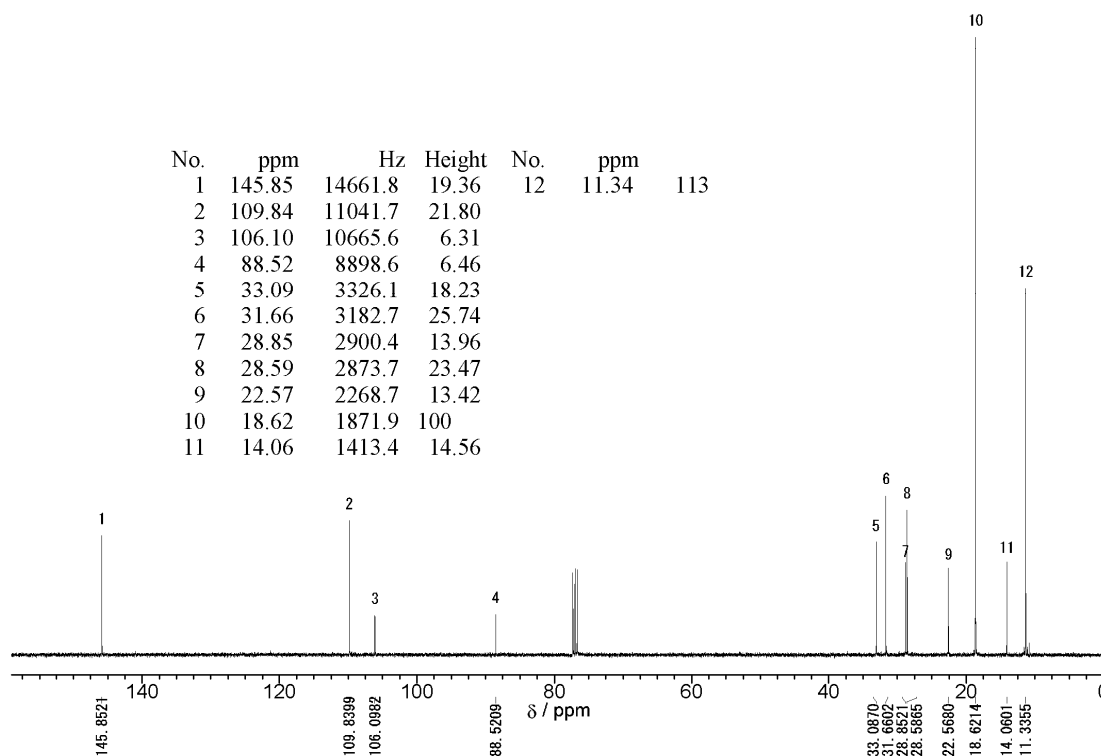

[<sup>1</sup>H and <sup>13</sup>C NMR Spectra of **5**]

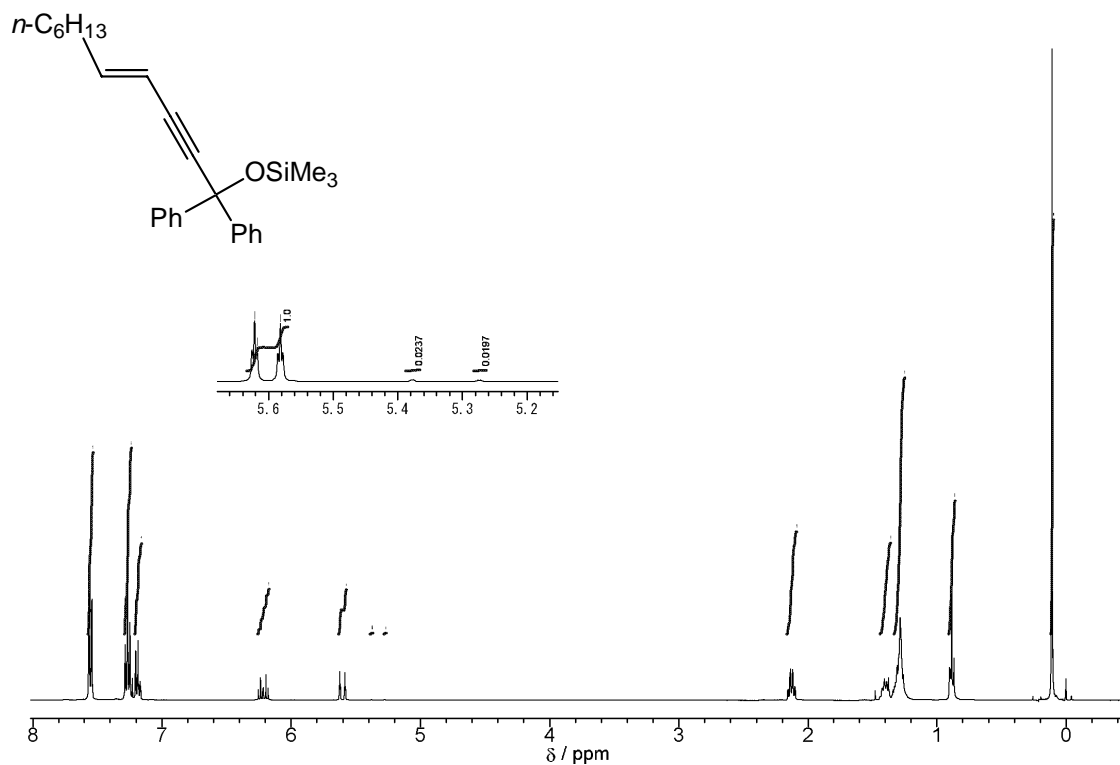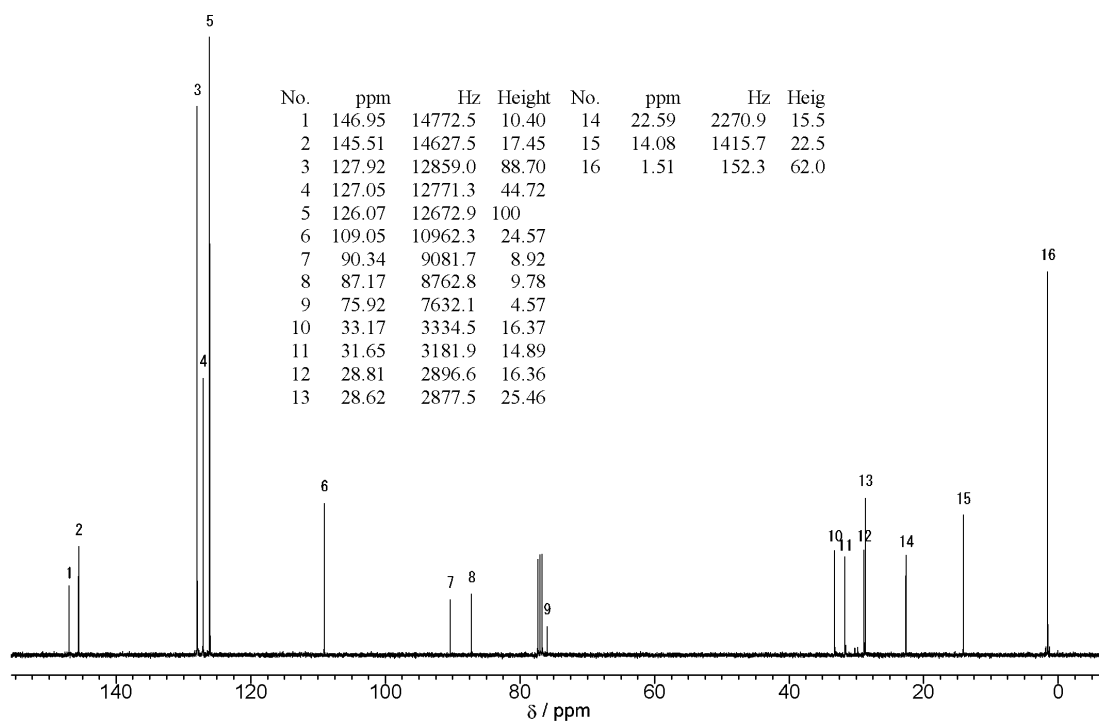

[<sup>1</sup>H and <sup>13</sup>C NMR Spectra of **10**]

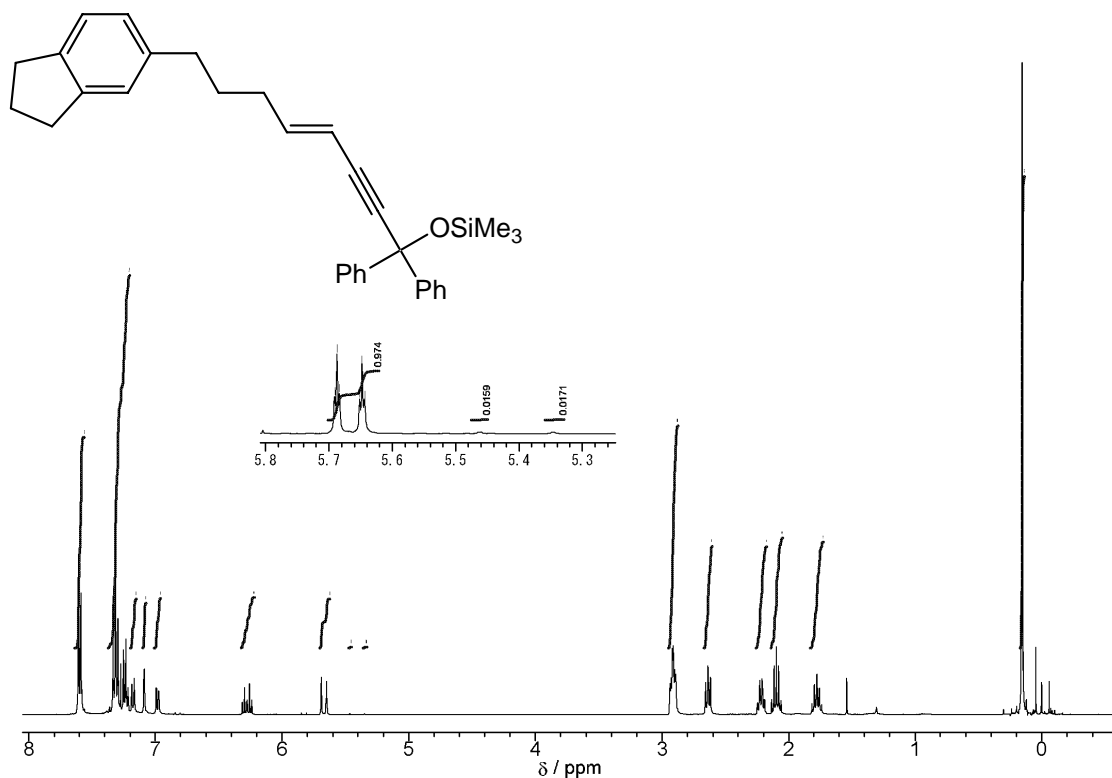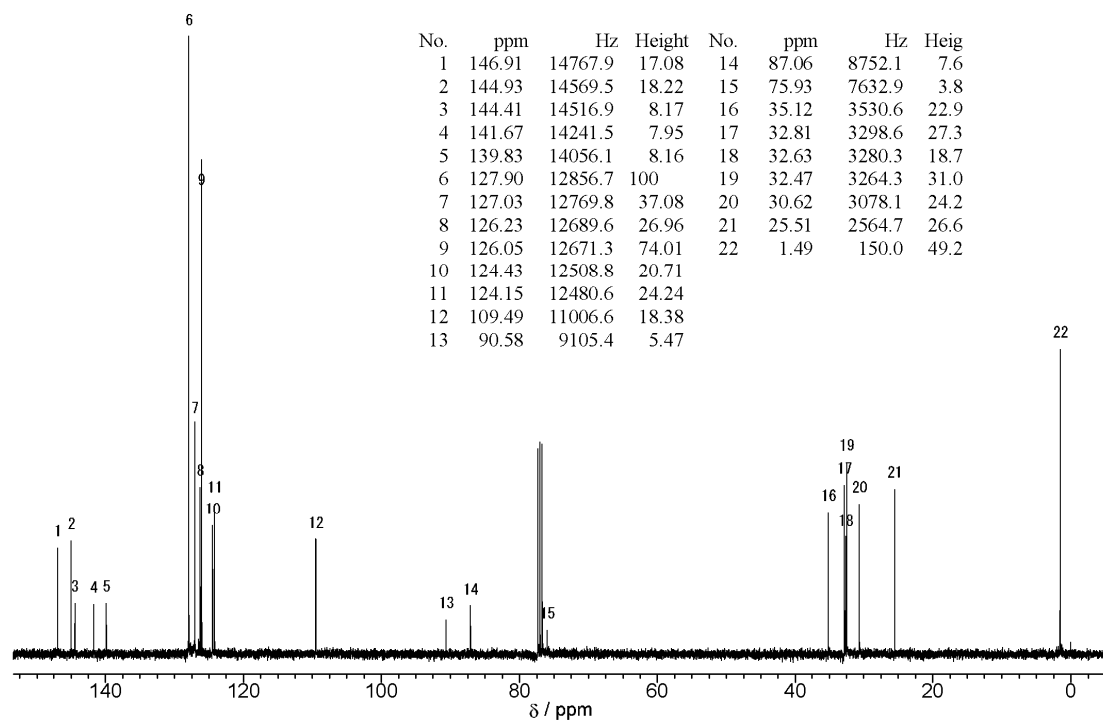

Supplement: b804573a.pdf [file b804573a.pdf]
